# Supplementary material
Source: Springer Nature journal article supplement (https://www.springermedizin.de/resource/supplementary/12889_2004_276_MOESM2_ESM.pdf/9500510)
Supplement: MOESM2 [file 9500510]

1. What religion do you practice?
2. Have you actively practiced your faith? Describe your experiences in a church or place of worship while you were growing up. Did you go to religious classes, ie. Sunday school during your childhood?
3. Was there someone who influenced you while you were growing up? In what way?
4. Did this person influence your belief system? Describe this person. What did they value the most in life? Were they church/temple/mosque-going? Did they talk to you about God? Did they encourage you to go to church?
5. Are you attending church now?
6. Describe your belief system now. Has it changed since you were diagnosed with HIV? If so, how?
7. How did you feel when you were diagnosed with HIV?
8. How do you feel about God today? Did you find God in church/mosque/temple?
9. Where is this person who influenced you and what is the relationship today?
10. Do you still think of that person (if absent) and what has remained with you?
